# Supplementary material for: Skin-mimetic tough polyurethane ionogel for use in soft ionotronics
Source: Royal Society of Chemistry journal article supplement (doi:10.1039/d3tc03661h), 2023-01-01
Supplement: d3tc03661h1.pdf [file d3tc03661h1.pdf]

## Supporting Information

*for*

### **Skin-mimetic tough polyurethane ionogel for use as soft ionotronics**

Bin Hong,<sup>1</sup> Yiyan Xu,<sup>1</sup> Jun Tan,<sup>2,\*</sup> Zeming Xie,<sup>3</sup> Si Yu Zheng,<sup>3,\*</sup> Qi Wang,<sup>1,4,\*</sup>

Zhijun Zhou,<sup>1</sup> Jintao Yang<sup>3,\*</sup>

1 Zhejiang Hexin New Material Co., Ltd., Jiaxing 314000, P. R. China

2 College of Biological, Chemical Science and Technology, Jiaxing University,  
Jiaxing 314001, P. R. China

3 Zhejiang Key Laboratory of Plastic Modification and Processing Technology,  
College of Materials Science & Engineering, Zhejiang University of Technology,  
Hangzhou 310014, P. R. China

4 Hexin Kuraray Micro Fiber Leather (Jiaxing) Co., Ltd., Jiaxing 314000, P. R. China

**Table S1. Composition of Samples.**

| Sample      | Molar ratio |           |         |     | ILs (wt%) | Solvent |
|-------------|-------------|-----------|---------|-----|-----------|---------|
|             | HDI         | PTMG-2000 | SB-diol | BDO |           |         |
| ZPU1-40%ILs | 10          | 5         | 1       | 4   | 40        | THF     |
| ZPU2-40%ILs | 10          | 5         | 2       | 3   | 40        | THF     |
| ZPU3-40%ILs | 10          | 5         | 3       | 2   | 40        | THF     |
| ZPU4-40%ILs | 10          | 5         | 4       | 1   | 40        | THF     |

**Table S2. Composition of Samples.**

| Sample      | Molar ratio |           |         |     | ILs (wt%) | Solvent |
|-------------|-------------|-----------|---------|-----|-----------|---------|
|             | HDI         | PTMG-2000 | SB-diol | BDO |           |         |
| ZPU1-40%ILs | 10          | 5         | 1       | 4   | 40        | THF/DMF |
| ZPU2-40%ILs | 10          | 5         | 2       | 3   | 40        | THF/DMF |
| ZPU3-40%ILs | 10          | 5         | 3       | 2   | 40        | THF/DMF |
| ZPU4-40%ILs | 10          | 5         | 4       | 1   | 40        | THF/DMF |

**Table S3. Composition of Samples.**

| Sample      | Molar ratio |           |         |     | ILs (wt%) | Solvent |
|-------------|-------------|-----------|---------|-----|-----------|---------|
|             | HDI         | PTMG-2000 | SB-diol | BDO |           |         |
| ZPU4-20%ILs | 10          | 5         | 4       | 1   | 20        | THF     |
| ZPU4-60%ILs | 10          | 5         | 4       | 1   | 60        | THF     |
| ZPU4-80%ILs | 10          | 5         | 4       | 1   | 80        | THF     |

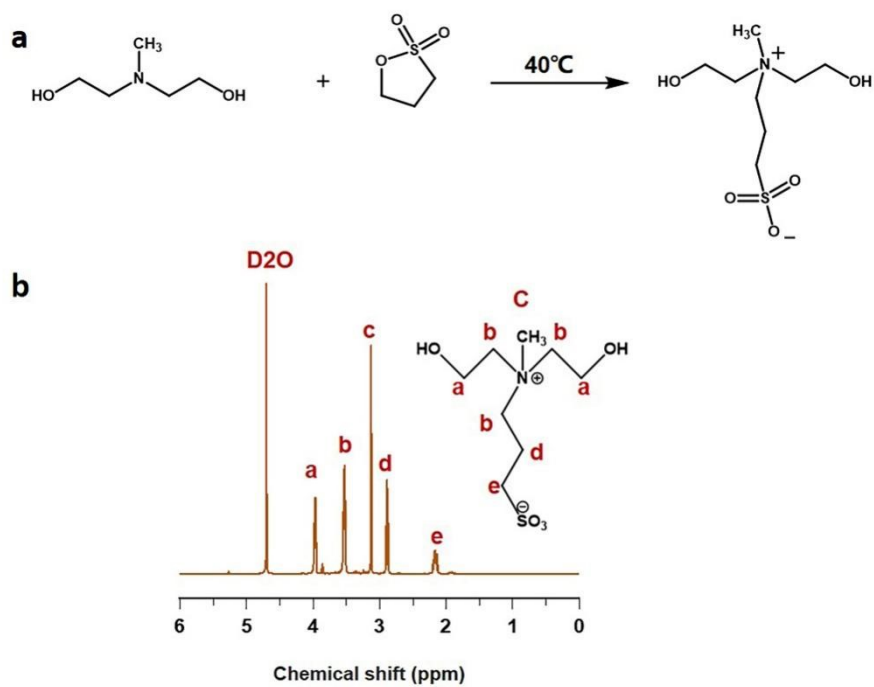

**Figure S1. (a) Reaction routes for synthesis of SB-diol. (b)  $^1\text{H}$  NMR spectra of SB-diol chain extender at 400 MHz,  $\text{D}_2\text{O}$ .**

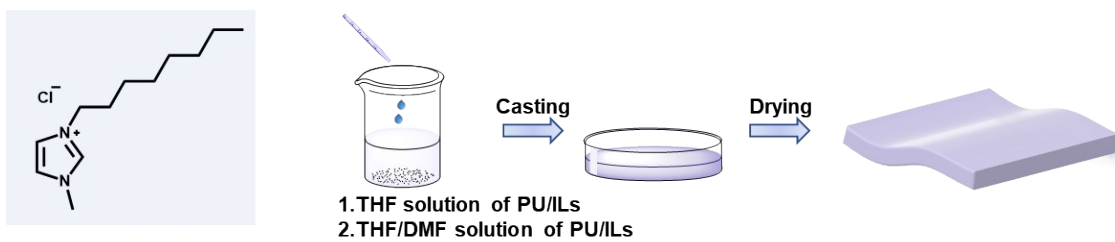

**Figure S2. Schematic preparation process of the ZPU ionogel.**

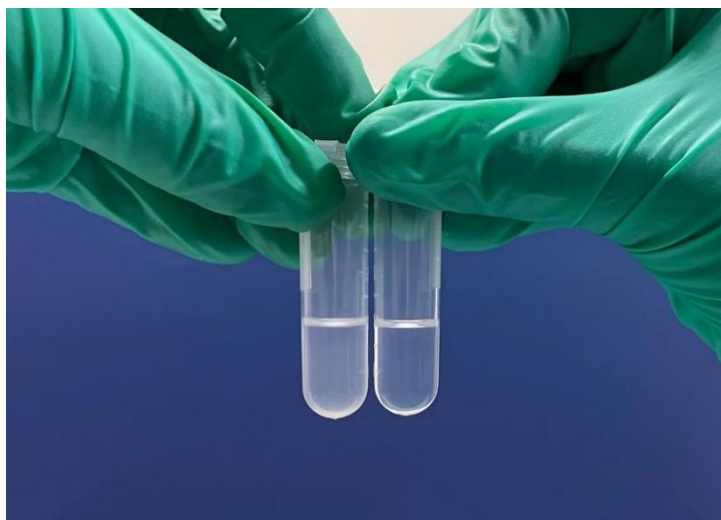

**Figure S3. Optical appearance of the ILs dispersion by using pure THF as solvent (left) and using THF/DMF as solvent (right).**

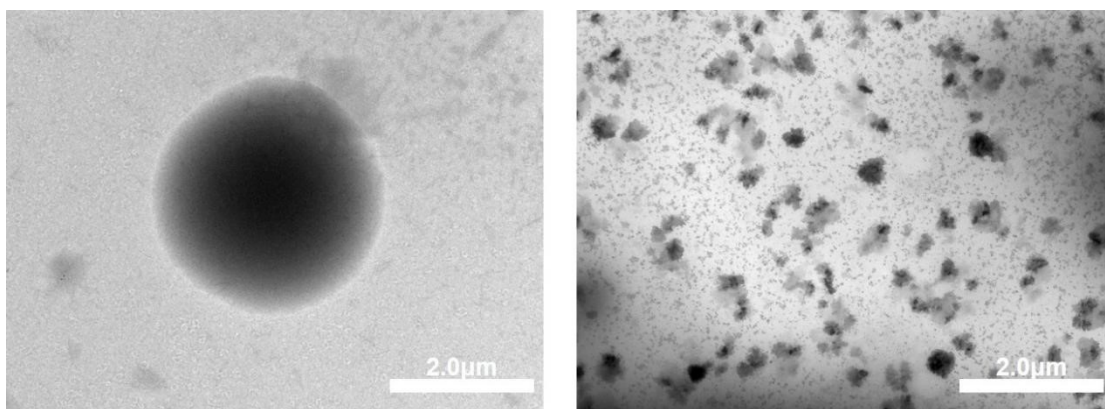

**Figure S4. TEM images of the ZPU ionogel from casting ZPU emulsion (left) and solution (right).**



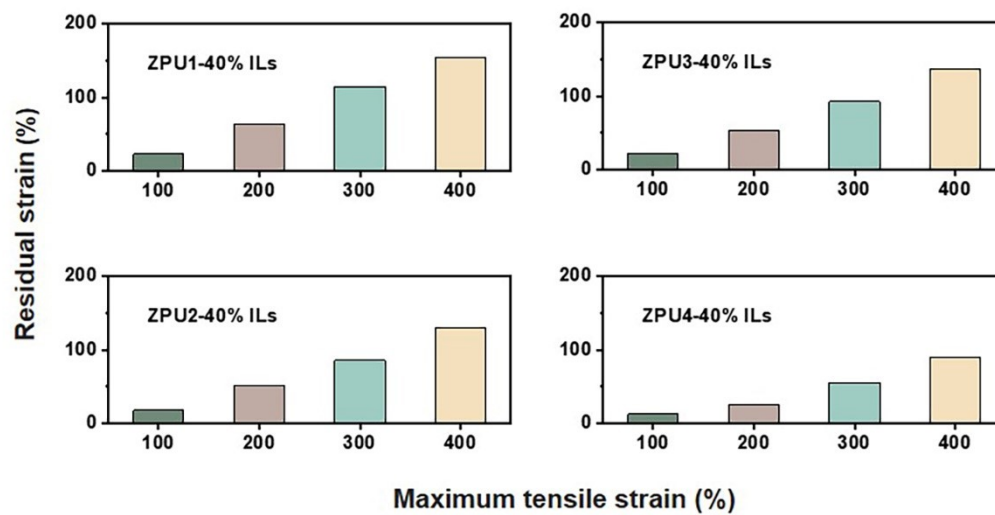

**Figure S5. Residual strain of ZPU ionogels stretched to different strain.**

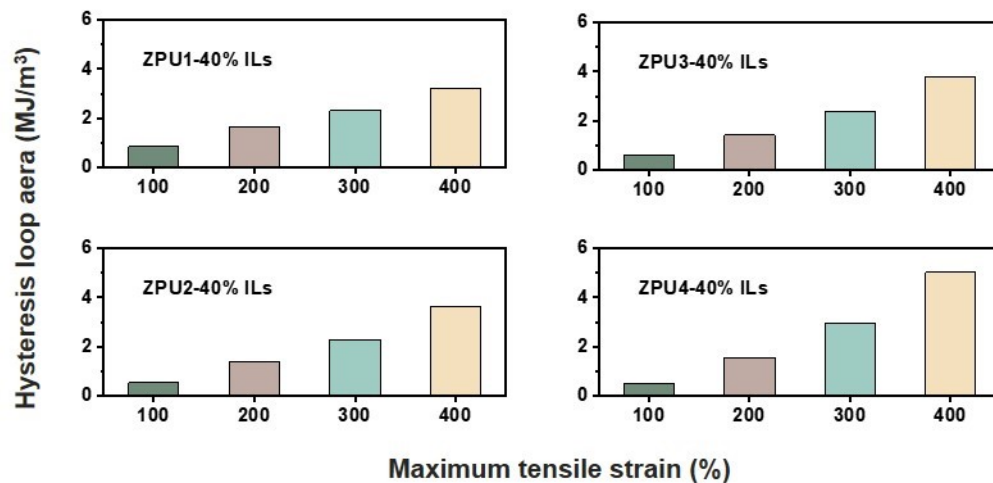

**Figure S6. Hysteresis loop area of ZPU ionogels stretched to different strain.**

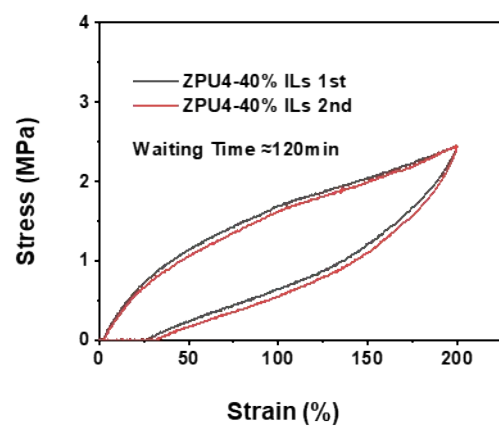

**Figure S7. Self-recovery performance of the ZPU ionogels.**

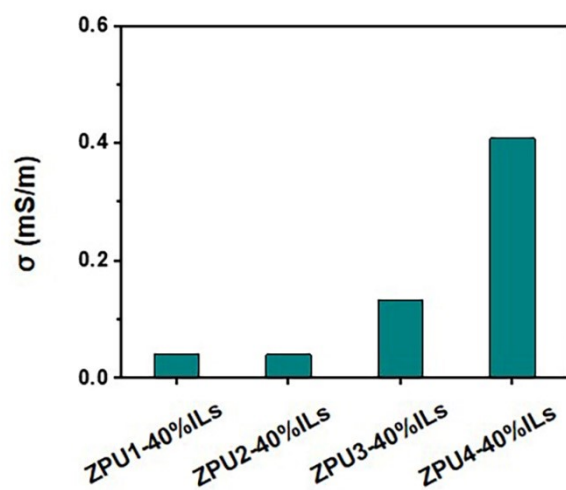

**Figure S8. Conductivity of the ZPU ionogel with different zwitterionic content.**

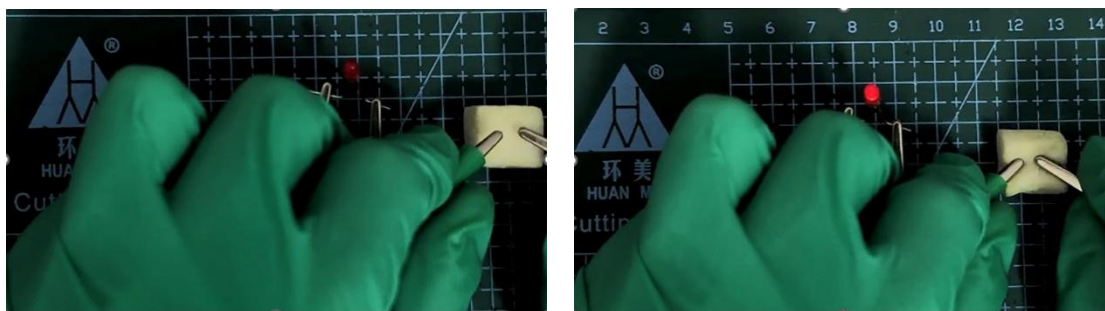

**Figure S9. Digital photographs of the ZPU/IL@Sponge acting as a conductor and lighting an LED bulb.**
